# Supplementary material for: Microplastics in gentoo penguins from the Antarctic region
Source: PubMed Central journal article supplement (PMC6775258; doi:10.1038/s41598-019-50621-2), 2019-10-02

# **Microplastics in gentoo penguins from the Antarctic region**

Filipa Bessa<sup>1\*</sup>, Norman Ratcliffe<sup>1,2</sup>, Vanessa Otero<sup>3</sup>, Paula Sobral<sup>4</sup>, João C. Marques<sup>1</sup>, Claire M. Waluda<sup>2</sup>, Phil N. Trathan<sup>2</sup>, José C. Xavier<sup>1,2</sup>

<sup>1</sup> MARE – Marine and Environmental Sciences Centre, Faculdade de Ciências e Tecnologia, Universidade de Coimbra, 3004-517 Coimbra, Portugal

<sup>2</sup> British Antarctic Survey, Natural Environment Research Council, High Cross, Madingley Road, Cambridge, CB3 0ET, UK

<sup>3</sup> Department of Conservation and Restoration and LAQV-REQUIMTE, Faculdade de Ciências e Tecnologia da Universidade Nova de Lisboa, 2829-516 Monte de Caparica, Portugal

<sup>4</sup> MARE-NOVA – Faculdade de Ciências e Tecnologia, Universidade NOVA de Lisboa, Campus da Caparica, 2829-516 Caparica, Portugal

Table 1S – Infrared characteristic bands ( $\text{cm}^{-1}$ ) of the identified polymers. Adapted from: Hummel, 2002. ( $\nu$  – stretching;  $\delta_{\text{as}}$  – asymmetric bending;  $\delta_{\text{s}}$  – symmetric bending; intensity band: vs – very strong; s – strong; m – medium; w – weak).

| Polymer                           | Characteristic band ( $\text{cm}^{-1}$ ) | Assignment                                                                        |
|-----------------------------------|------------------------------------------|-----------------------------------------------------------------------------------|
| Polyethylene                      | 2918 vs, 2850 s                          | $\nu_{\text{as}}(\text{CH}_2)$ , $\nu_{\text{s}}(\text{CH}_2)$                    |
|                                   | 1472 w                                   | $\delta_{\text{as}}(\text{CH}_2)$                                                 |
| Polypropylene                     | 2960 vs, 2877 m                          | $\nu_{\text{as}}(\text{CH}_3)$ , $\nu_{\text{s}}(\text{CH}_3)$                    |
|                                   | 2918 s, 2838 m                           | $\nu_{\text{as}}(\text{CH}_2)$ , $\nu_{\text{s}}(\text{CH}_2)$                    |
|                                   | 1460 m                                   | $\delta_{\text{as}}(\text{CH}_3)$                                                 |
|                                   | 1377 m                                   | $\delta_{\text{s}}(\text{CH}_3)$                                                  |
| Semi-synthetic cellulose<br>Rayon | 3650-3000 s                              | $\nu(\text{OH})$                                                                  |
|                                   | 2990-2820 w                              | $\nu(\text{CH})$                                                                  |
|                                   | 1425, 1372, 1320 m                       | $\delta(\text{CH})$                                                               |
|                                   | 1200-1000 vs                             | $\delta(\text{C-OH}) + \delta(\text{C-C}) + \nu(\text{C-O-C}) + \nu(\text{C-OH})$ |
| Polyester                         | 2966 w                                   | $\nu(\text{CH})$                                                                  |
|                                   | 1720 vs                                  | $\nu(\text{C=O})$                                                                 |
|                                   | 1408 m                                   | $\delta(\text{ring})$                                                             |
|                                   | 1340 m                                   | $\delta(\text{CH})$                                                               |
|                                   | 1261/1246 s, 1117/1102 s                 | $\nu(\text{COC})$                                                                 |
|                                   | 1018 m, 728 m                            | $\delta(\text{CH ring})$                                                          |
| Polyacrylonitrile                 | 2935 m, 2870 m                           | $\nu_{\text{as}}(\text{CH}_2)$ , $\nu_{\text{s}}(\text{CH}_2)$                    |
|                                   | 2243 vs                                  | $\nu(\text{CN})$                                                                  |
|                                   | 1731 s                                   | $\nu(\text{C=O})$                                                                 |
|                                   | 1451 s                                   | $\delta(\text{CH}_2)$                                                             |
| Polyacrylate                      | 2960-2870 w                              | $\nu(\text{CH})$                                                                  |
|                                   | 1731 vs                                  | $\nu(\text{C=O})$                                                                 |
|                                   | 1270 w, 1242 w, 1150 s                   | $\nu(\text{COC})$                                                                 |

Fig. 1S – Infrared spectra of the microplastic samples (below) and the respective polymer (synthetic and semi-synthetic) reference spectra (top) identified as: A) Polyethylene; B) Polypropylene; C) Rayon (Semi-synthetic cellulose); D) Polyester; E) Polyacrylonitrile; F) Polyacrylate and G) similar to poly(ethylacrylate:st:acrylamide).

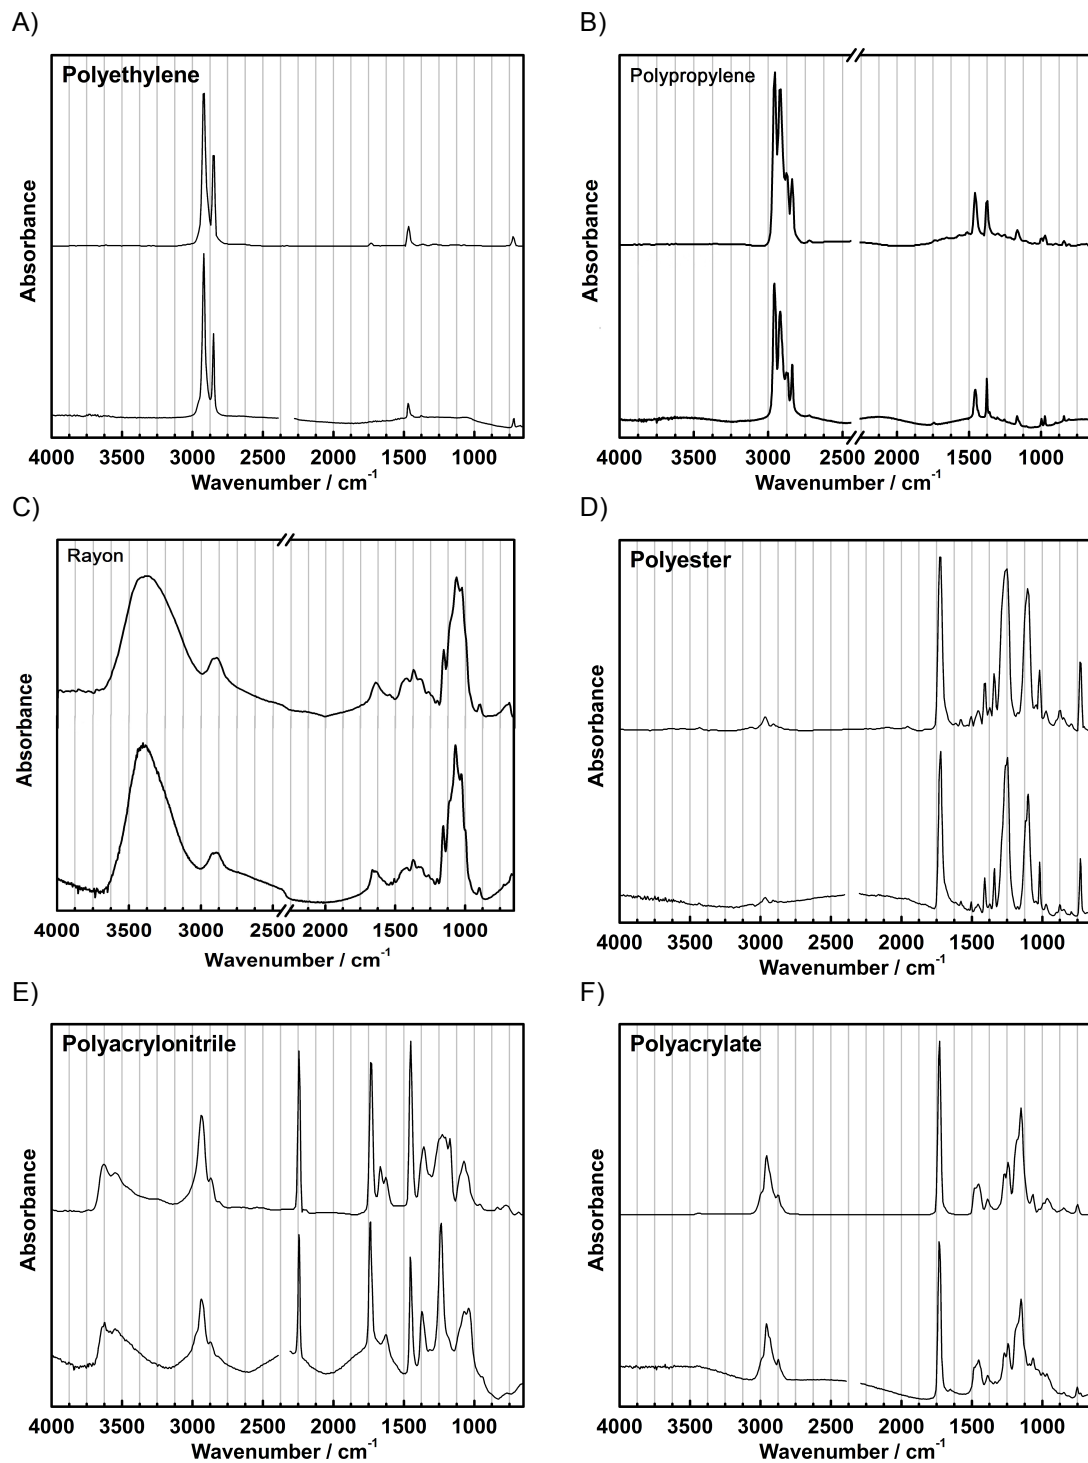

G)

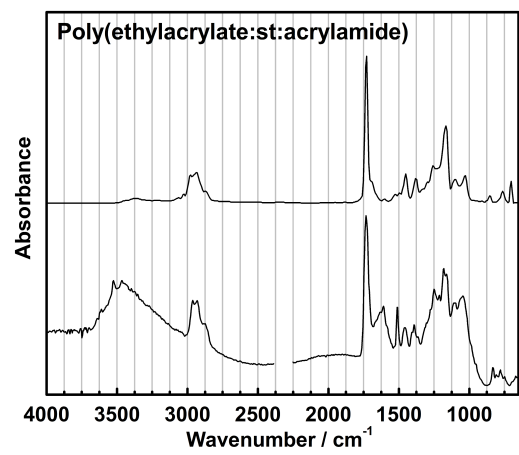

Supplement: 41598_2019_50621_MOESM1_ESM.pdf [file 41598_2019_50621_MOESM1_ESM.pdf]
